# Supplementary figures and images for: Seasonal and interannual Dissolved Organic Carbon transport process dynamics in a subarctic headwater catchment revealed by high-resolution measurements
Source: Copernicus journal article supplement (doi:10.5194/egusphere-2023-1986), 2023-09-06

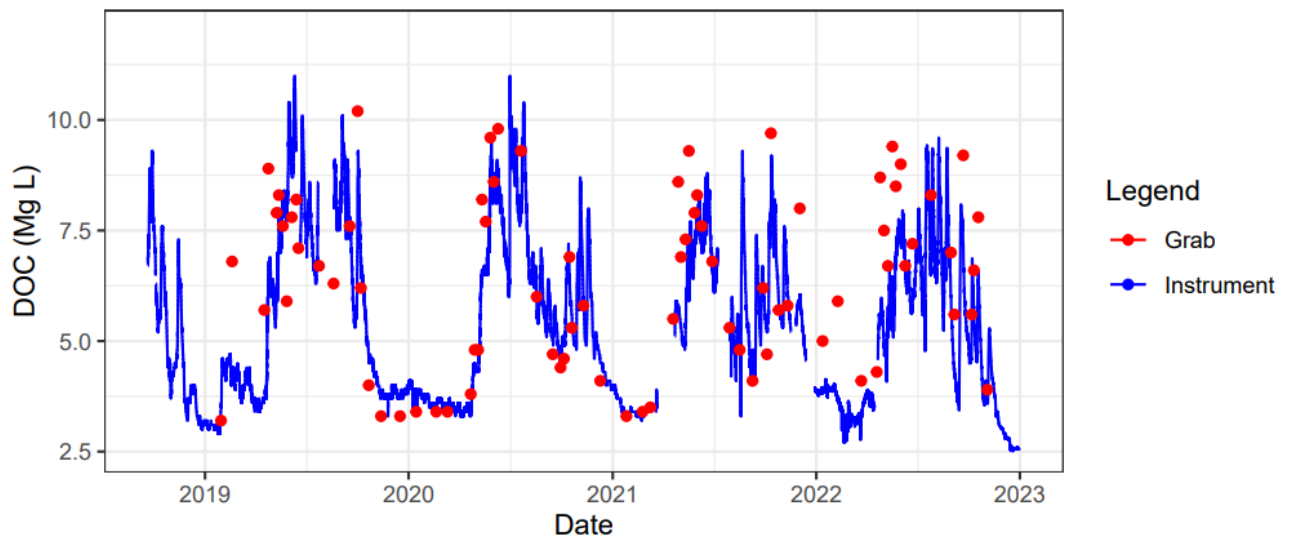

**Figure S1** – Grab samples for DOC vs Instrument measured samples throughout the study period.

Supplement: Supplementary file 1 [file egusphere-2023-1986-supplement.pdf]
